# Supplementary material
Source: ML conference proceedings conference paper supplement (https://openreview.net/forum?id=rIu1efxaLg)
Supplement: supplementary_material [file attachment]

# Supplementary Materials: Generalize to Fully Unseen Graphs: Learn Transferable Hyper-Relation Structures for Inductive Link Prediction

Anonymous Authors

## A THE HYPERPARAMETERS OF HYREL

Due to the limited pages of the main body, we introduce some details of HyRel in the following sections. The proposed HyRel is implemented in PyTorch with a single GeForce RTX 3090 GPU. During training, we set the validation frequency to every 200 epochs, with a total of 10,000 epochs. In the loss  $\mathcal{L}_g$ , the number of negative samples is 10. Other hyperparameters include number of layers for relations and entities  $L = 1$ ,  $\tilde{L} \in \{2, 3, 4\}$ , learning rate  $\in \{0.0005, 0.001\}$ ,  $\gamma \in \{1.0, 2.0, 2.5\}$ , hidden dimensions of relations  $dr' \in \{64, 128, 256\}$ , hidden dimensions of entities  $de' \in \{64, 128, 256\}$ . In both Section 4.2 and Section 4.4, the multi-head attention mechanism utilizes either 8 or 16 heads. To maintain consistency with all baseline models, we set the final embedding dimensions of entities and relations in our model to 32, i.e.,  $de = dr = 32$ .

## B THE DETAILED INFORMATION OF THE DATASETS

Table 1 displays detailed information about the datasets, showing the specific numbers of entities, relations, and triples in both the training and testing graphs.

Table 1: Detailed information of the 12 datasets used for inductive link prediction.

| Datasets | $\widetilde{\mathcal{G}}_{\text{tra}}$ |                            |                            | $\widetilde{\mathcal{G}}_{\text{inf}}$ |                            |                            |
|----------|----------------------------------------|----------------------------|----------------------------|----------------------------------------|----------------------------|----------------------------|
|          | $\mathcal{E}_{\text{tra}}$             | $\mathcal{R}_{\text{tra}}$ | $\mathcal{F}_{\text{tra}}$ | $\mathcal{E}_{\text{inf}}$             | $\mathcal{R}_{\text{inf}}$ | $\mathcal{T}_{\text{inf}}$ |
| NL-100   | 1,258                                  | 55                         | 7,832                      | 1,709                                  | 53                         | 3,964                      |
| NL-75    | 2,607                                  | 96                         | 11,058                     | 1,578                                  | 116                        | 3,031                      |
| NL-50    | 4,396                                  | 106                        | 17,578                     | 2,335                                  | 119                        | 4,294                      |
| NL-25    | 4,396                                  | 106                        | 17,578                     | 2,146                                  | 120                        | 3,717                      |
| FB-100   | 4,659                                  | 134                        | 62,809                     | 2,624                                  | 77                         | 11,645                     |
| FB-75    | 4,659                                  | 134                        | 62,809                     | 2,792                                  | 186                        | 15,528                     |
| FB-50    | 5,190                                  | 153                        | 85,375                     | 4,445                                  | 205                        | 19,394                     |
| FB-25    | 5,190                                  | 163                        | 91,571                     | 4,097                                  | 216                        | 28,579                     |
| WK-100   | 9,784                                  | 67                         | 49,875                     | 12,136                                 | 37                         | 22,479                     |
| WK-75    | 6,853                                  | 52                         | 28,741                     | 2,722                                  | 65                         | 5,717                      |
| WK-50    | 12,022                                 | 72                         | 82,481                     | 9,328                                  | 93                         | 16,121                     |
| WK-25    | 12,659                                 | 47                         | 41,873                     | 3,228                                  | 74                         | 5,652                      |
